# Supplementary material
Source: ML conference proceedings conference paper supplement (https://openreview.net/forum?id=0pPsZs1vc7)
Supplement: supplementary_material [file attachment]

---

# Adapting Segment Anything Model (SAM) to Experimental Datasets via Fine-Tuning on GAN-based Simulation: A Case Study in Additive Manufacturing

---

Anonymous Author(s)

Affiliation

Address

email

## Abstract

1 Industrial X-ray computed tomography (XCT) is a powerful tool for non-destructive  
2 characterization of materials and manufactured components. However, it faces  
3 significant challenges due to the complexity of internal structures, noise, and vari-  
4 ability in resolution. Traditional computer vision models often struggle with noise,  
5 resolution variability, and complex internal structures, particularly in scientific  
6 imaging applications. State-of-the-art foundational models, like the *Segment Any-  
7 thing Model (SAM)*—designed for general-purpose image segmentation—have  
8 revolutionized image segmentation across various domains, yet their application in  
9 specialized fields like materials science remains under-explored. In this work, we  
10 explore the application and limitations of SAM for industrial X-ray CT inspection  
11 of additive manufacturing components. We demonstrate that while SAM shows  
12 promise, it struggles with out-of-distribution data, multiclass segmentation, and  
13 computational efficiency during fine-tuning. To address these issues, we propose  
14 a fine-tuning strategy utilizing parameter-efficient techniques, specifically *Conv-  
15 LoRa*, to adapt SAM for material-specific datasets. Additionally, we leverage  
16 generative adversarial network (GAN)-generated data to enhance the training pro-  
17 cess and improve the model’s segmentation performance on complex X-ray CT  
18 data. Our experimental results highlight the importance of tailored segmentation  
19 models for accurate inspection, showing that fine-tuning SAM on domain-specific  
20 scientific imaging data significantly improves segmentation performance. However,  
21 despite improvements, the model’s ability to generalize across diverse datasets  
22 remains limited, highlighting the need for further research into robust, scalable  
23 solutions for domain-specific segmentation tasks. Code and training data will be  
24 available in public.

| No.  | Size |
|------|------|
| Tr-1 | 5724 |
| Tr-2 | 1142 |
| Te-1 | 920  |
| Te-2 | 920  |
| Te-3 | 5000 |
| Te-4 | 1080 |
| Te-5 | 600  |
| Te-6 | 785  |

Table 1: Dataset specification.

25 **SAM-GAN Finetuning Settings:** We finetune on 4 GPUs of 80GB memory for finetuning. Learning  
26 rate set to .0003 and batch size was set to 4. Each training ran for 20 epochs. Most finetuning  
27 converge by 15 iterations. Each training finishes within 4 hours.

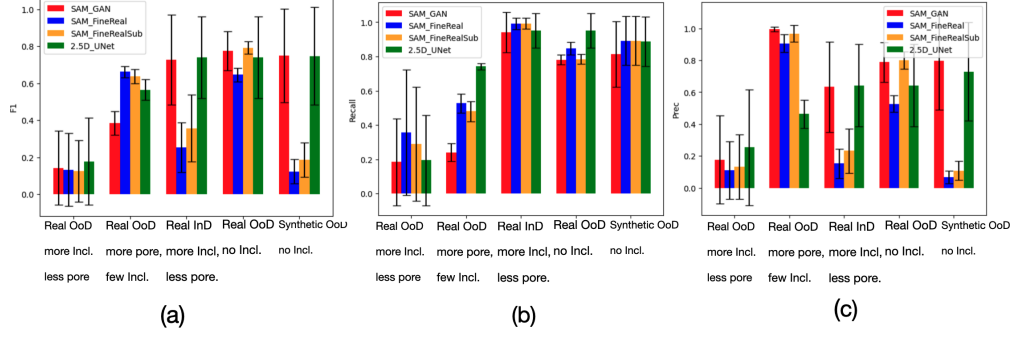

Figure 1: (a)-(c)(from left to right) mean-F1, mean-Recall, and mean-Precision values of *SAM* , *SAM-FineReal* , *SAM-FineReal-Sub* , and *U-Net* for the class *Pore* . It is noted that the recall values of *SAM* is lower for real OoD, while precisions are high in majority cases. This shows *SAM* identifies many as false negative pores than false positives in OoD.

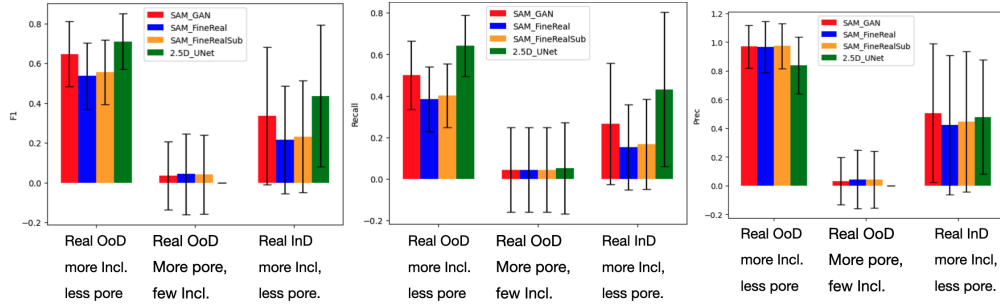

Figure 2: (a)-(c)(from left to right) mean-F1, mean-Recall, and mean-Precision values of *SAM* , *SAM-FineReal* , *SAM-FineReal-Sub* , and *U-Net* for the class *Inclusion* . It is noted that the recall values of *SAM* is lower for real OoD, while precisions are high in majority cases. This shows *SAM* identifies many as false negative pores than false positives in OoD.

## 28 0.1 Additional Results of OoD

29 Fig. 1 and Fig. 2 shows the mean-F1, mean-Recall, and mean-Precision for the OoD datasets (emphTe-  
 30 1-Te-5) for class *Pore* and *Inclusion* respectively. FIG. 3 shows the performance using same metric on  
 31 all classes for all test OoD data.

## 32 References

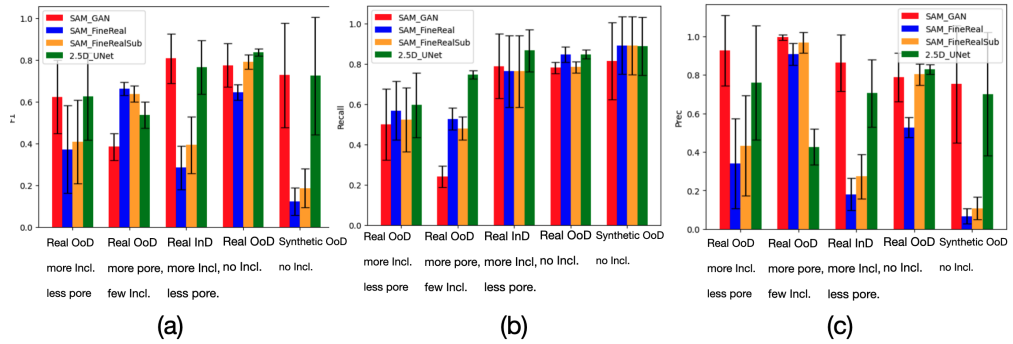

Figure 3: Analogous to Fig. 1, shows performance on all classes together. High value of F1 is dominated by high precision than recall.
